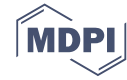

Article

# Time-Dependent Maximum Entropy Model for Populations of Retinal Ganglion Cells<sup>†</sup>

Geoffroy Delamare<sup>1,2</sup> orcid number:0000-0001-6217-4370

Ulisse Ferrari<sup>1</sup> orcid number:0000-0002-3131-5537

<sup>1</sup> Institut de la Vision, Sorbonne Université, INSERM, CNRS, 17 rue Moreau, 75012, Paris

<sup>2</sup> Current address: Bioengineering Department, Imperial College London, London SW7 2AZ, UK

\* Ulisse Ferrari, [ulisse.ferrari@inserm.fr](mailto:ulisse.ferrari@inserm.fr)

† Submitted to International Workshop on Bayesian Inference and Maximum Entropy Methods in Science and Engineering, IHP, Paris, July 18-22, 2022.

Version July 13, 2022 submitted to Entropy

**Abstract:** The inverse Ising model is used in computational neuroscience to infer probability distributions of the synchronous activity of large neuronal populations. This method allows for finding the Boltzmann distribution with single neuron biases and pairwise interactions that maximizes the entropy and reproduces the empirical statistics of the recorded neuronal activity. Here we apply this strategy to large populations of retinal output neurons (ganglion cells) of different types, stimulated by multiple visual stimuli with their own statistics. The activity of retinal output neurons is driven by both the inputs from upstream neurons, which encode the visual information and reflect stimulus statistics, and the recurrent connections, which induce network effects. We first apply the standard inverse Ising model approach, and show that it accounts well for the system's collective behavior when the input visual stimulus has short-ranged spatial correlations, but fails for long-ranged ones. This happens because stimuli with long-ranged spatial correlations synchronize the activity of neurons over long distances. This effect cannot be accounted for by pairwise interactions, and so by the pairwise Ising model. To solve this issue, we apply a previously proposed framework that includes a temporal dependence in the single neurons biases to model how neurons are driven in time by the stimulus. Thanks to this addition, the stimulus effects are taken into account by the biases, and the pairwise interactions allow for characterizing the network effect in the population activity and for reproducing the structure of the recurrent functional connections in the retinal architecture. In particular, the inferred interactions are strong and positive only for nearby neurons of the same type. Inter-type connections are instead small and slightly negative. Therefore, the retinal architecture splits into weakly interacting subpopulations composed of strongly interacting neurons. Overall, this temporal framework fixes the problems of the standard, static, inverse Ising model and accounts for the system's collective behavior, for stimuli with either short or long-range correlations.

**Keywords:** Inverse problems; Maximum Entropy; Computational Neuroscience; Retinal Ganglion Cells; Neuronal Recordings; Multi-Electrode Array Experiments; Time-Dependent Stimulus Statistics

The inverse Ising model (IM) is a modelling strategy to infer Boltzmann distribution with pairwise interactions from data. In systems biology, it has been applied to model the behaviour of large systems with many units that interact one with another, ranging from neuronal ensembles in both early sensory systems [1–4], cortex [5–10] and neuronal cultures [1,11], to proteins [12–15], antibodies [16] and even flocks of birds [17]. To better understand the effectiveness of the inverse IM in modeling biological data, empirical benchmarks [18] and several theoretical investigations [19–22] have also been performed.

The inverse IM approach neglects any temporal evolution of the system and assumes that its activity can be described as a stationary state [1]. Although this simplification works well in many

33 practical applications, it cannot lead to a satisfying model when the system is strongly driven by  
34 external stimuli [4,10,23,24]. In this study, we consider the activity of retinal output neurons in response  
35 to visual stimuli with different statistics and show that the inverse IM approach fails in accounting  
36 for the empirical statistics when the stimulus has strong and long-ranged correlations. To solve this  
37 issue, the inverse IM framework has been extended to include the effects of time-varying external  
38 stimuli into the activity of the retinal output neurons [23]. More recently [4,25], this time-dependent  
39 framework has been empowered by focusing on a population of retinal neurons of the same type.  
40 Here, we perform a step further and consider the case of a population of neurons of two different  
41 types, subject to two external stimuli with very different statistics. Then, in accordance with previous  
42 results [4], we show that the temporal framework provides a very effective model also when the visual  
43 stimulus has strong and long-ranged correlations.

44 We conclude our work by analysing the properties of the inferred functional interactions between  
45 retinal neurons. Neurons of the same type are evenly spaced over a two-dimensional triangular lattice,  
46 forming regular *mosaics* [26]. The inferred interactions are strong and positive only for nearby neurons  
47 of the same type, whereas distant neurons do not interact directly. Connections between neurons of  
48 different type are instead small (or sometimes slightly negative), also for nearby cells. Therefore, the  
49 retinal architecture splits into weakly interacting subpopulations of strongly interacting neurons.

## 50 1. Recording of retinal ganglion cells

51 We focus on the activity of two populations of 18 ON and 25 OFF rat retinal output neurons  
52 (known as ganglion cells) [27], recorded during one *ex-vivo* multi-electrode array experiment [28].  
53 These experiments allow to measure the times at which each neuron emits a spike in response to an  
54 ongoing visual stimulation. ON and OFF neurons have opposite polarities, meaning that they respond  
55 preferentially to, respectively, increase or decrease of light intensity [26]. Additionally, thanks to  
56 standard techniques [28], it is possible to locate the position of each neuron within the two-dimensional  
57 retinal output layer (Fig. 1A). To validate our results, we also consider a second experiment where 21  
58 ON and 32 OFF retinal output neurons were stimulated with the same videos.

59 During the experiments, the retina was stimulated by two different black-and-white videos  
60 repeated multiple times (Fig. 1B&C): a white-noise checkerboard stimulus with strong but short-ranged  
61 spatial correlations, and a full-field video whose luminosity flickers over different grey values, *i.e.* with  
62 strong spatial correlations that extend over the entire scene.

63 After binning the spiking activity with small windows of  $\Delta t = 20ms$ , we can associate to each  
64 neuron  $i$  in each time-bin  $t$  during repetition  $r$  a binary variable  $\sigma_i^r(t)$  equal to  $+1$  if the neuron spiked  
65 in the time-bin or  $-1$  if not. Thanks to this preprocessing, we end up with a sequence of snapshots of  
66 neuronal activity  $\{\sigma_i^r(t)\}_{i=1}^N$ , which can be seen as observations of system configurations. At first, we  
67 estimated each neuron's *mean activity*, that is the average of  $\sigma_i^r(t)$  over the recordings. Mean activities  
68 in response to the two stimuli were very similar (Fig. 1D&E), for both type of neurons. However,  
69 covariances were different across stimuli: the checkerboard induced strong, short-ranged correlations  
70 whereas the full-field induced strong correlations over longer distances. (Fig. 1F&G).

## 71 2. Inverse disordered Ising model

72 In order to analyse the retinal spiking activity, Schneidman et al. [1] has proposed to consider the  
73 probability distribution  $P(\sigma)$  of observing a given activity snapshot  $\sigma$ , regardless of the time at which  
74 it has been observed. As shown before (Fig. 1F and G), neuronal activities show strong correlations,  
75 suggesting that neurons are not independent. Therefore,  $P(\sigma)$  can not be modelled as a collection  
76 of independent distributions, but it requires an interacting model. For this scope, the principle of  
77 maximum entropy suggests to consider all the probability distributions reproducing the empirical  
78 mean of all the single variable terms ( $\sigma_i$ ) and their pairwise products ( $\sigma_i\sigma_j$ ), the covariances, to then  
79 select the one with the largest entropy. This leads to the construction of the well known pairwise  
80 disordered Ising model (IM) [1,29]:

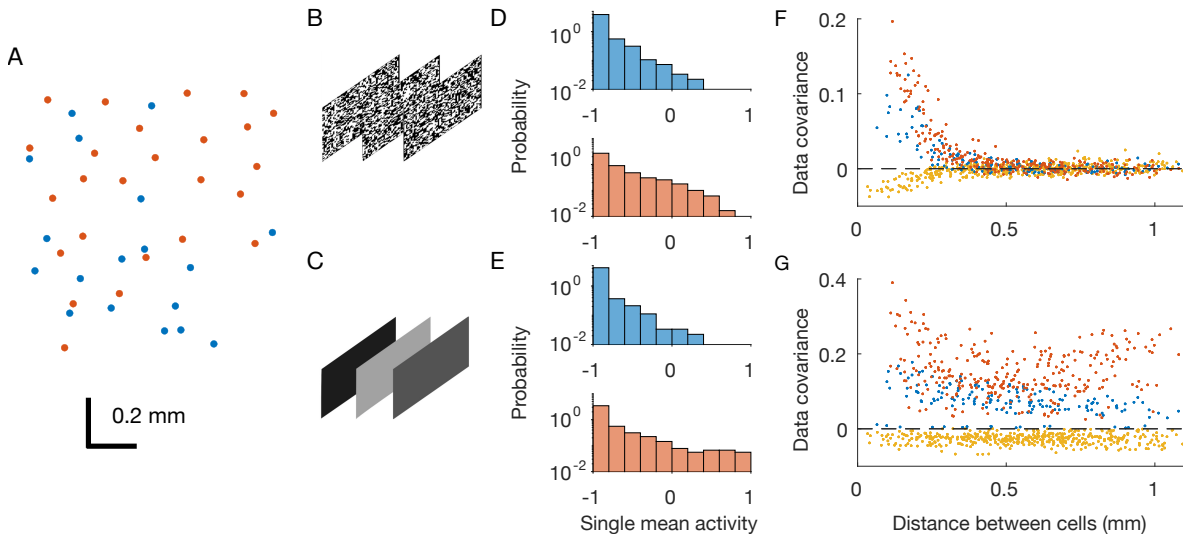

**Figure 1. Retinal multi-electrode array experiments.** OFF neurons and OFF-OFF pairs are in red, ON and ON-ON pairs in blue, OFF-ON pairs in yellow. A) Physical positions of the recorded neurons within the two-dimensional retinal output layer. Each dot correspond to a neuron. B-C) Two considered stimuli are checkerboard and full-field flicker. D-E) Distribution of single neuron mean activities. F-G) Pairwise covariances as a function of the physical distance between the neurons.

$$P(\sigma) \sim \exp \left\{ \sum_i h_i \sigma_i + \sum_{i < j} J_{ij} \sigma_i \sigma_j \right\}, \quad (1)$$

81 with yet unknown biases  $h$  and couplings  $J$ , that have to be inferred from data. To estimate  
 82 these parameters, we can compute the model (log-)likelihood over the dataset, and search for the set  
 83 of parameters that maximises it [29]. Additionally, in order to limit noise effects, we added an  $L_2$   
 84 regularization over the biases  $h$  and an  $L_1$  regularization over the couplings  $J$  [29]. Finally, because  
 85 the considered systems are too large for performing an exact inference, we used a pseudo-Newton  
 86 Markov-chain Monte-Carlo algorithm [30].

87 As expected by model construction [29], the inferred distributions were able to reproduce the  
 88 neurons' mean activities and covariances (Fig. 2A, B), showing that we solved the inference problem  
 89 for both stimuli with high accuracy. Both biases (Fig. 2C, D) and couplings (Fig. 2E, F) inferred from  
 90 the response to the two stimuli are different. In particular, for the checkerboard stimulus, which has  
 91 short-ranged stimulus correlations, we observe strong positive or negative couplings only between  
 92 nearby neurons, while couplings between distant ones are very small. For the full-field video, which  
 93 instead has long-ranged stimulus correlations, we observe strong couplings, even at large distances.  
 94 Overall these results show that the inferred couplings depend on the correlation structure of the  
 95 stimulus: by acting as correlated input to the neurons, the stimulus induces strong correlations among  
 96 certain pairs of neurons, and consequently strong couplings among them [4].

97 Lastly, we notice how the inferred inverse disordered IM is capable of predicting the empirical  
 98 probability distribution of the network activity ( $\sum_i \sigma_i$ ) for the checkerboard stimulus, but it fails to do  
 99 so for the full-field flicker (Fig. 2F,G). This distribution reflects the collective behaviour of the whole  
 100 system, and therefore depends on the high-order statistics of the neuronal activities. As such, the  
 101 pairwise structure of the checkerboard video, due to the short-ranged correlations, can be accounted  
 102 for by a model with pairwise couplings. However, for the full-field flicker, the stimulus synchronises  
 103 the whole neuronal population altogether. As a consequence, the correlations structure is not pairwise  
 104 and the pairwise inverse IM struggles to reproduce such higher-order neuronal statistics. A similar  
 105 effect has been reported previously for the activity of cortical neurons during Slow-Wave Sleep [10].

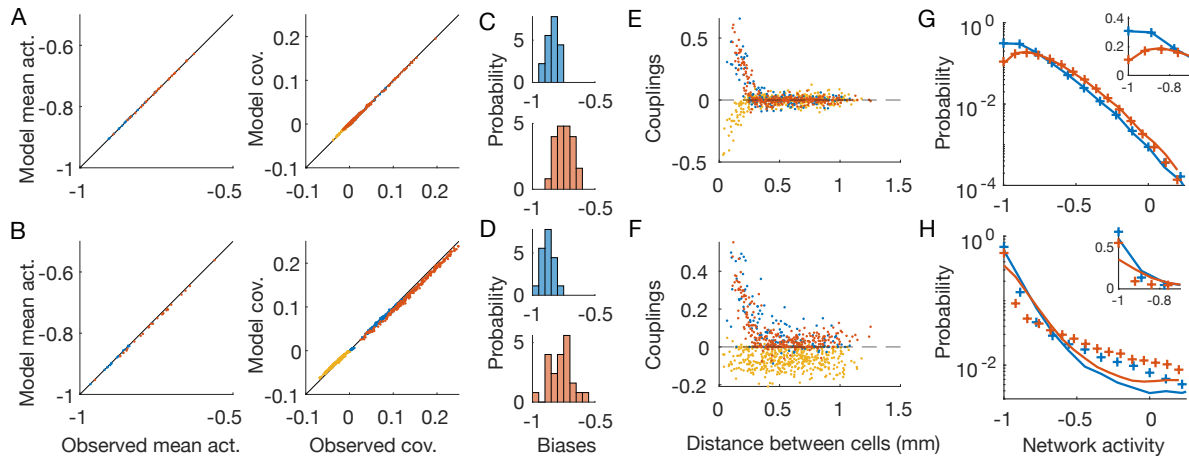

**Figure 2. Inverse disordered Ising model.** OFF neurons and OFF-OFF pairs are in red, ON and ON-ON in blue, OFF-ON pairs in yellow. The first line shows results for the checkerboard stimulus, the second for the full-field one (Fig.1B and C). A,B) Inferred IM reproduces the neurons' mean activities and covariances with high precision. C,D) Distribution of the inferred biases  $h$ . E,F) Inferred pairwise couplings  $J$  as a function of the physical distance between the neurons. G,H) Empirical (plus signs) and model-predicted (lines) probability distributions of the network activity of the two neuronal populations. Inset: zoom in linear scale.

### 106 3. Time-dependent model

107 Instead of constructing a single probability distribution  $P(\sigma)$  for the whole recording, in the  
 108 time-dependent Ising model framework [4,23], we build a collection of probability distributions  
 109  $\{P^t(\sigma)\}_{t=1}^T$ , one for each time-bin. Following the maximum entropy principle, we search for the  
 110 probability distribution that has the maximum entropy among those that reproduce the mean single  
 111 neuron activities in each time-bin  $\langle\sigma_i(t)\rangle = 1/R \sum_r \sigma_i^r(t)$ , where  $r$  runs over the  $R$  repetitions of  
 112 the stimulus. We also require that the model reproduces the total pairwise correlations  $\langle\sigma_i\sigma_j\rangle =$   
 113  $1/(RT) \sum_{r,t} \sigma_i^r(t)\sigma_j^r(t)$  computed over both time and repetitions, the same observables imposed for the  
 114 inverse IM (Eq. 1). This leads us to the following model:

$$P_t(\sigma) \sim \exp \left\{ \sum_i h_i[t] \sigma_i + \sum_{i<j} J_{ij} \sigma_i \sigma_j \right\}. \quad (2)$$

115 In the model (2) the biases  $h[t]$  carry the temporal dependence that accounts for the time-evolution  
 116 of the stimulus drive. However, because we haven't asked the model to reproduce the pairwise  
 117 correlations in each temporal window, but only the averaged one, the couplings  $J$  are constant in time.  
 118 This choice is biologically motivated: the couplings reflect the internal connections between neurons  
 119 within the retinal architecture and therefore should be independent of the stimulus [4]. Additionally,  
 120 this also limits the number of parameters avoiding the risk of overfitting. As in the inverse IM, we  
 121 include an  $L_2$  regularisation on the biases and an  $L_1$  on the couplings with the same strength.

122 As expected by model construction, the inferred time-dependent distributions reproduce the  
 123 empirical mean activities and covariances (Fig. 3A, B), showing that we solved the inference problem  
 124 for both stimuli with high accuracy. As before (Fig. 2C,D), the inferred biases show different  
 125 distributions for the two stimuli (Fig. 2C,D). The inferred couplings have instead a much similar  
 126 behavior (Fig. 3E,F), showing a fast decay with the distance between the neuron pairs, for both the  
 127 checkerboard and the full-field stimulus. In particular, those between neurons of different types  
 128 are zero or slightly negative, whereas those between nearby neurons of the same type large and  
 129 positive. Lastly, in the case of the time-dependent IM, the inferred model is capable of predicting the  
 130 empirical probability distribution of the network activity for both stimuli with high accuracy (Fig.  
 131 3G,H). Consistently with previous findings [4], these results show that by using time-dependent IM

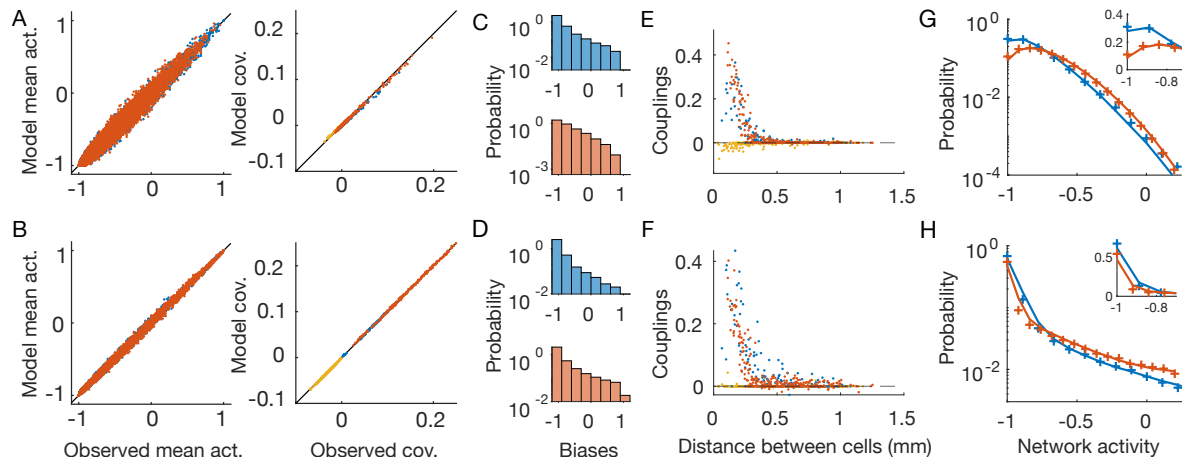

**Figure 3. Time-dependent Ising model.** OFF neurons and OFF-OFF pairs are in red, ON and ON-ON in blue, OFF-ON pairs in yellow. The first line show results for the checkerboard stimulus, the second for the full-field one (Fig.1B and C). A,B) Inferred time-dependent IM reproduces the neurons' mean activities and covariances with high precision. C,D) Distribution of the inferred biases  $h[t]$ . E,F) Inferred pairwise couplings  $J$  as a function of the physical distance between the neurons. G,H) Empirical (plus signs) and model-predicted (lines) probability distributions of the network activity of the two neuron populations. Inset: zoom in linear scale.

132 we are capable of disentangling the collective behaviours that arise because neurons receive correlated  
 133 inputs, from those that are instead due to network effects.

#### 134 4. The geometry of the functional connectivity

135 The behaviour of the inferred couplings with distance from the response to the full-field stimulus  
 136 (Figs. 2F and 3F) are very different. In the case of the inverse IM, couplings are strong also for distant  
 137 pairs and seem to reflect the correlation structure of the stimulus. In the case of the time-dependent  
 138 IM, instead, interactions decrease fast with distance and seem not to reflect the correlation structure of  
 139 the stimulus. To test for this, we compare the couplings inferred from the two stimuli (Fig.4 A,B). In  
 140 the case of the time-dependent IM, the couplings are indeed much more similar (Pearson correlation  
 141  $\rho = 0.935$ , against  $\rho = 0.699$  for the inverse IM). We conclude that the inferred couplings of the  
 142 time-dependent IM reflect only the functional connectivity between retinal output neurons.

143 Retinal output neurons lie on a two-dimensional layer, and their positions can easily be determined  
 144 by standard methods as their receptive field centres [28] (Fig.1A). In order to better visualise the  
 145 structure of the inferred couplings of the time-dependent IM, we can introduce an arbitrary, but robust,  
 146 small threshold, set to zero all the smaller couplings ( $|J| < 0.05$ ), and draw an interaction lattice (Fig.  
 147 4C, D). After thresholding, the lattice splits into two subcomponents, one for each type, with mostly  
 148 nearest-neighbour interactions. Unfortunately, during these experiments, it is difficult to detect all the  
 149 neurons of a given type within the recorded retinal patch. Some neurons are therefore missing, and  
 150 this prevents a solid study of the lattice connectivity. However, given well-known results on retinal  
 151 mosaics of the literature [26], and by looking at the most complete region of (Fig. 4C, D), we expect  
 152 that if we were able to record all the neurons, the resulting lattice would be an irregular honeycomb,  
 153 with connectivity equal to six. Inferred interactions are strong and positive only for nearby neurons of  
 154 the same type (Fig.3E,F). Consequently, only couplings between nearby neurons are above threshold  
 155 and the functional connectivity lattice show nearest neighbour interactions. Additionally, because  
 156 inter-type connections are very small or slightly negative, the retinal architecture splits into weakly  
 157 interacting subpopulations - each composed of strongly interacting neurons.



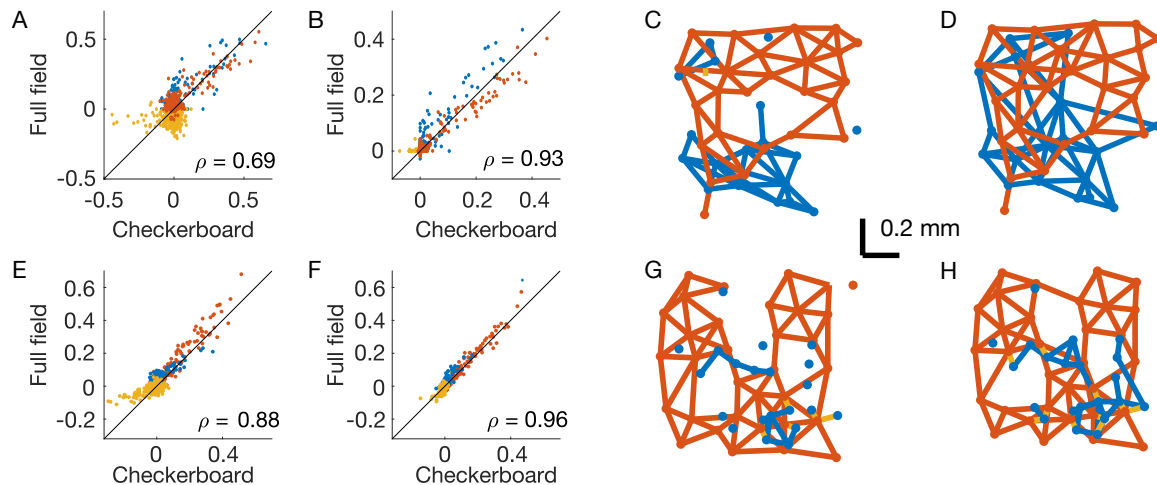

**Figure 4. Structure of the inferred couplings.** OFF-OFF couplings are in red, ON-ON in blue, OFF-ON in yellow. A) Scatterplot of the inferred couplings for the two stimuli in the inverse IM. B) As (A), but for the time-dependent IM.  $\rho$  is the Pearson correlation. C,D) Interaction lattice after thresholding the inferred couplings of the time-dependent IM for the checkerboard (C) and full-field stimuli (D). E-H, same as A-D, but for a second example experiment where retinal neurons responded to the same visual stimulations.

158 In order to corroborate these results, we have performed the same analysis on a second example  
159 dataset where retinal neurons were stimulated with the same visual stimulations (both checkerboard  
160 and full-field). Results are fully consistent and very similar to those of the first experiment (Fig.4E-H).

## 161 5. Conclusions

162 In this work, we focused on modelling the activity of two large populations of retinal output  
163 neurons of different types. We inferred two different models: the widely used disordered IM [1], and  
164 its more recent development, the time-dependent IM [4,23,25]. For each model, we compared the  
165 inferred parameters obtained from the retinal response to two very different visual stimulations: the  
166 checkerboard, with short spatial correlations, and the full-field with long ones. In particular we showed  
167 that the inferred couplings of the disordered IM, but not those of the time-dependent IM, depend  
168 strongly on the stimulus statistics (Fig.4A,E against Fig.4B,F). Consistently, the inferred couplings of  
169 the second model are very similar across visual stimulations (Fig.4B, F). The time-dependent model  
170 is therefore capable of disentangling the collective behaviours induced by the correlated inputs to  
171 the retinal output neurons, from those arising from network effects [4]. As a consequence, we can  
172 interpret the inferred couplings as functional connections and characterise the structure of the retinal  
173 output-layer architecture. The inferred interactions are strong and positive only for nearby neurons  
174 of the same type, whereas distant neurons do not interact directly. Connections between neurons of  
175 different type are instead small (or sometimes slightly negative), also for nearby cells. Therefore, the  
176 retinal architecture splits into weakly interacting subpopulations composed of strongly interacting  
177 neurons.

178 In principle, functional connectivity could also be obtained from the disordered IM inferred  
179 from spontaneous activity where a constant, full-field stimulus is played. In this case, the stimulus  
180 has no spatial correlations and the inferred couplings will only reflect the structure of the retinal  
181 connectivity. However, in wildtype retinas, spontaneous activity is usually very weak (few Hz)  
182 compared to stimulated activity (up to 50-60 Hz in our case). As a consequence, in order to have the  
183 same empirical statistics, one would need much longer recording, which are however very difficult to  
184 obtain because of experimental instabilities and limitations.

185 The inferred functional connectivity matches with known properties of biological networks.  
186 Depending on the type, output retinal neurons can be connected by direct gap-junction between

187 nearby pairs, or by an indirect connection through multiple gap-junction passing through amacrine  
188 cells [31]. In both cases, only nearby neurons are strongly interacting, and this is nicely reproduced by  
189 the functional connections inferred from the time-dependent model. Network effects can also arise  
190 from shared noise coming from presynaptic neurons in the retina - mostly photoreceptors noise. This  
191 effect can explain the negative correlations between neurons of different type (and polarity) [32], and  
192 in turn the slightly negative couplings inferred for nearby neurons.

193 The time-dependent IM takes into account the stimulus effects with the temporal dependence  
194 of the single neuron biases  $h[t]$ . Instead of modelling the stimulus processing performed by the  
195 retina directly, it only reproduces the response behavior in time. Consistently, in order to infer the  
196 model, we only used the response to repeated stimulations, without the need of the actual videos.  
197 As a consequence, the time-dependent IM cannot generalize to new *unseen* (during training) stimuli  
198 and this might limit its possible applications. To overcome these limitations, the time-dependent IM  
199 has been extended to its stimulus-dependent generalization [4,23], where the biases become actual  
200 functions of the stimulus. This allows for inferring deep convolutional neural networks [27,33–35] to  
201 predict the mean neuronal response to stimulus, combined with IM couplings to account for network  
202 effects.

## 203 6. Acknowledgments

204 This work was supported by the Agence Nationale de la Recherche (ANR-21-CE37-0024  
205 NatNetNoise), by LabEx LIFESENSES (ANR-10-LABX-65), by IHU FOReSIGHT (ANR-18-IAHU-01,  
206 IHU-AIDE-UF), by Sorbonne Université with the Emergence program (CrInforNet) and by a grant  
207 from AVIESAN-UNADEV (AIDE).

## 208 References

- 209 1. Schneidman, E.; Berry, M.; Segev, R.; Bialek, W. *Weak pairwise correlations imply strongly correlated network*  
210 *states in a population*. *Nature* **2006**, *440*, 1007.
- 211 2. Shlens, J.; Field, G.D.; Gauthier, J.L.; Grivich, M.I.; Petrusca, D.; Sher, A.; Litke, A.M.; Chichilnisky, E. The  
212 structure of multi-neuron firing patterns in primate retina. *Journal of Neuroscience* **2006**, *26*, 8254–8266.
- 213 3. Tkacik, G.; Marre, O.; Amodei, D.; Schneidman, E.; Bialek, W.; M.J., B. *Searching for collective behaviour in a*  
214 *network of real neurons*. *PloS Comput. Biol.* **2014**, *10*(1), e1003408.
- 215 4. Ferrari, U.; Deny, S.; Chalk, M.; Tkačik, G.; Marre, O.; Mora, T. Separating intrinsic interactions from  
216 extrinsic correlations in a network of sensory neurons. *Physical Review E* **2018**, *98*, 042410.
- 217 5. Marre, O.; El Boustani, S.; Frégnac, Y.; Destexhe, A. Prediction of Spatiotemporal Patterns of Neural  
218 Activity from Pairwise Correlations. *Phys. Rev. Lett.* **2009**, *102*, 138101.
- 219 6. Hamilton, L.S.; Sohl-Dickstein, J.; Huth, A.G.; Carels, V.M.; Deisseroth, K.; Bao, S. *Optogenetic Activation*  
220 *of an Inhibitory Network Enhances Feedforward Functional Connectivity in Auditory Cortex*. *Neuron* **2013**,  
221 *80*, 1066–76.
- 222 7. Tavoni, G.; Ferrari, U.; Battaglia, F.; Cocco, S.; Monasson, R. Functional Coupling Networks Inferred from  
223 Prefrontal Cortex Activity Show Experience-Related Effective Plasticity. *Network Neuroscience* **2017**, pp.  
224 1–27.
- 225 8. Meshulam, L.; Gauthier, J.L.; Brody, C.D.; Tank, D.W.; Bialek, W. Collective behavior of place and non-place  
226 neurons in the hippocampal network. *Neuron* **2017**, *96*, 1178–1191.
- 227 9. Donner, C.; Obermayer, K.; Shimazaki, H. Approximate inference for time-varying interactions and  
228 macroscopic dynamics of neural populations. *PLoS computational biology* **2017**, *13*, e1005309.
- 229 10. Nghiem, T.A.; Telenczuk, B.; Marre, O.; Destexhe, A.; Ferrari, U. Maximum-entropy models reveal  
230 the excitatory and inhibitory correlation structures in cortical neuronal activity. *Physical Review E* **2018**,  
231 *98*, 012402.
- 232 11. Shimazaki, H.; Sadeghi, K.; Ishikawa, T.; Ikegaya, Y.; Toyozumi, T. Simultaneous silence organizes  
233 structured higher-order interactions in neural populations. *Scientific reports* **2015**, *5*, 9821.
- 234 12. Weigt, M.; White, R.; Szurmant, H.; Hoch, J.; Hwa, T. *Identification of direct residue contacts in protein–protein*  
235 *interaction by message passing*. *PNAS* **2009**, *106*(1), 67–72.

- 236 13. Santolini, M.; Mora, T.; Hakim, V. *A General Pairwise Interaction Model Provides an Accurate Description of In*  
237 *Vivo Transcription Factor Binding Sites*. *PLoS Comput Biol* **2014**, *9*(6), E99015.
- 238 14. De Leonadis, E.; Lutz, B.; Ratz, S.; Cocco, S.; Monasson, R.; Schug, A.; Weigt, M. Direct-Coupling Analysis  
239 of nucleotide coevolution facilitates RNA secondary and tertiary structure prediction. *Nucleic Acids Res.*  
240 **2015**, *43*, 10444–10455. doi:10.1093/nar/gkv932.
- 241 15. Figliuzzi, M.; Jacquier, H.; Schug, A.; Tenaillon, O.; Weigt, M. Coevolutionary landscape inference and the  
242 context-dependence of mutations in beta-lactamase tem-1. *Mol. Biol. Evol.* **2016**, *33*, 268–280, [1510.03224].  
243 doi:10.1093/molbev/msv211.
- 244 16. Mora, T.; Walczak, A.M.; Bialek, W.; Callan, C.G. Maximum entropy models for antibody diversity. *Proc.*  
245 *Natl. Acad. Sci.* **2010**, *107*, 5405–5410, [0912.5175]. doi:10.1073/pnas.1001705107.
- 246 17. Bialek, W.; Cavagna, A.; Giardina, I.; Mora, T.; Silvestri, E.; Viale, M.; Walczak, A.M. Statistical  
247 mechanics for natural flocks of birds. *Proc. Natl. Acad. Sci. U. S. A.* **2012**, *109*, 4786–91, [1107.0604].  
248 doi:10.1073/pnas.1118633109.
- 249 18. Ferrari, U.; Obuchi, T.; Mora, T. Random versus maximum entropy models of neural population activity.  
250 *Phys. Rev. E* **2017**, *95*, 042321.
- 251 19. Roudi, Y.; Nirenberg, S.; Latham, P.E. Pairwise maximum entropy models for studying large biological  
252 systems: when they can work and when they can't. *PLoS computational biology* **2009**, *5*, e1000380.
- 253 20. Obuchi, T.; Cocco, S.; Monasson, R. Learning probabilities from random observables in high dimensions:  
254 the maximum entropy distribution and others. *Journal of Statistical Physics* **2015**, *161*, 598–632.
- 255 21. Obuchi, T.; Monasson, R. Learning probability distributions from smooth observables and the maximum  
256 entropy principle: some remarks. *Journal of Physics: Conference Series*. IOP Publishing, IOP Publishing,  
257 2015, Vol. 638, p. 012018.
- 258 22. Merchan, L.; Nemenman, I. On the Sufficiency of Pairwise Interactions in Maximum Entropy Models of  
259 Networks. *Journal of Statistical Physics* **2016**, *162*, 1294–1308.
- 260 23. Granot-Atedgi, E.; Tkacik, G.; Segev, R.; Schneidman, E. Stimulus-dependent Maximum Entropy Models  
261 of Neural Population Codes. *PLOS Computational Biology* **2013**, *9*, 1–14. doi:10.1371/journal.pcbi.1002922.
- 262 24. Priesemann, V.; Shriki, O. Can a time varying external drive give rise to apparent criticality in neural  
263 systems? *PLoS computational biology* **2018**, *14*, e1006081.
- 264 25. Sorochynskiy, O.; Deny, S.; Marre, O.; Ferrari, U. Predicting synchronous firing of large neural populations  
265 from sequential recordings. *PLoS computational biology* **2021**, *17*, e1008501.
- 266 26. Wässle, H. *Parallel processing in the mammalian retina*. *Nature Reviews Neuroscience* **2004**, *5*, 747–57.
- 267 27. Deny, S.; Ferrari, U.; Mace, E.; Yger, P.; Caplette, R.; Picaud, S.; Tkačik, G.; Marre, O. Multiplexed  
268 computations in retinal ganglion cells of a single type. *Nature communications* **2017**, *8*, 1964.
- 269 28. Marre, O.; Amodei, D.; Deshmukh, N.; Sadeghi, K.; Soo, F.; Holy, T.; Berry, M. *Recording of a large and*  
270 *complete population in the retina*. *Journal of Neuroscience* **2012**, *32*(43), 1485973.
- 271 29. Cocco, S.; Monasson, R. *Adaptive cluster expansion for inferring Boltzmann machines with noisy data*. *Phys.*  
272 *Rev. Lett.* **2011**, *106*, 090601.
- 273 30. Ferrari, U. Learning maximum entropy models from finite-size data sets: A fast data-driven algorithm  
274 allows sampling from the posterior distribution. *Phys. Rev. E* **2016**, *94*, 023301.
- 275 31. Brivanlou, I.; Warland, D.; Meister, M. *Mechanisms of Concerted Firing among Retinal Ganglion Cells*. *Neuron*  
276 **1998**, *20*, 527–539.
- 277 32. Völgyi, B.; Chheda, S.; Bloomfield, S. Tracer Coupling Patterns of the Ganglion Cell Subtypes in the Mouse  
278 Retina. *J. Comp. Neurol.* **2009**, *512*, 664–687.
- 279 33. McIntosh, L.; Maheswaranathan, N.; Nayebi, A.; Ganguli, S.; Baccus, S. Deep learning models of the retinal  
280 response to natural scenes. *Advances in Neural Information Processing Systems*, 2016, pp. 1361–1369.
- 281 34. Mahuas, G.; Isacchini, G.; Marre, O.; Ferrari, U.; Mora, T. A new inference approach for training shallow  
282 and deep generalized linear models of noisy interacting neurons. *Advances in neural information processing*  
283 *systems* **2020**, *33*, 5070–5080.
- 284 35. Goldin, M.A.; Lefebvre, B.; Virgili, S.; Ecker, A.; Mora, T.; Ferrari, U.; Marre, O. Context-dependent  
285 selectivity to natural scenes in the retina. *bioRxiv* **2021**.
